# Supplementary material for: Zfx Facilitates Tumorigenesis Caused by Activation of the Hedgehog Pathway
Source: Oxford University Press journal article supplement (doi:10.1158/0008-5472.can-14-0834), 2014-08-28
Supplement: 00085472can140834-sup-128758_2_supp_2572652_n92pyw.doc [file 00085472can140834-sup-128758_2_supp_2572652_n92pyw.doc]

## SUPPLEMENTAL FIGURE LEGENDS

**Figure S1**. **Topical tamoxifen treatment initiates formation of Sox9+ BCC in the skin**

As in Figure 1, *Ptch1*flox/flox *Zfx*+/y *R26-CreER*+ (*Ptch1*) and *Ptch1*flox/flox *Zfx*flox/y *R26-CreER*+ (*Ptch1*-*Zfx*) mice, along with *Ptch1*flox/flox *R26-CreER*- controls (Ctrl), were treated topically with tamoxifen (Tmx) to induce deletion of *Ptch1* alone or of both *Ptch1* and *Zfx* in the skin. Dorsal skin sections sections were stained for Sox9, which marks hair follicles and BCC, at 8-9 weeks after topical Tmx. Shown are representative micrographs of Ctrl, *Ptch1*, and *Ptch1*-*Zfx* dorsal skin sections stained with anti-Sox9 antibody and counterstained with hematoxylin. Scale bars represent 100 m.

**Figure S2. *Zfx* co-deletion impairs BCC progression after Hh pathway activation by expression of a constitutively active *Smo* allele**

Mice carrying tamoxifen (Tmx)-inducible Cre recombinase and an inducible “stop-floxed” transgene encoding the constitutively active *R26-SmoM2* allele, with (*SmoM2-Zfx*) or without (*SmoM2*)a conditional allele of *Zfx*, were treated with Tmx on shaved dorsal skin, as described in Figure 1.

(A) Representative photographs showing dorsal skin of mice of the indicated genotypes following euthanasia 5-6 or 8-10 weeks after Tmx treatment.

(B&C) BCC formation in treated dorsal skin after *SmoM2* induction. Shown are representative micrographs of sections of dorsal skin isolated 5-6 weeks or8-10 weeks after Tmx treatment from *SmoM2* and *SmoM2-Zfx* mice, then stained with H&E (B) or with anti-Zfx antibody (C). Scale bars represent 100 m.

(D) Pathology scores in treated skin after Tmx treatment to inititate *SmoM2*-dependent BCC induction. Shown are the fractions of indicated BCC severity scores in *SmoM2* and *SmoM2-Zfx* mice, with *Ptch1*flox/flox *Zfx*WT/Y *R26-CreER-* mice serving as Ctrl (n = 5, 3, and 5, respectively).

**Figure S3. Loss of *Zfx* does not affect normal cerebellar growth**

*hGFAP*-Cre+ *Zfx*flox/y mice with CNS-specific *Zfx* deletion have normal lifespan and lack obvious pathology (not shown). *hGFAP*-Cre+ *Zfx*flox/y mice were sacrificed at post-natal days 24 (P24, n=2) and 293 (P293, n=2). Shown are representative cerebellar sections stained with H&E or immunostained with anti-Zfx antibody. Scale bars represent 500 m (H&E) or 50 m (anti-Zfx).

**Figure S4. The expression of Zfx in different molecular subtypes of MB**

Microarray-based expression profiles of MB tumor subtypes from mice (A, dataset GSE34126, ref ) and humans (B, dataset GSE21140, ref ) were interrogated for the expression of Zfx. Shown are signals from individual tumors. The expression of the Hh target Gli1 is shown as a positive control. Statistical significance was estimated by the non-parametric Mann-Whitney test.

(A) Signals for three Zfx-specific probes in microarray dataset GSE34126 from mouse MB models. Shown are Zfx probe signals from wild-type neural stem cells (WT); from MB tumors derived from stem cells (S) or progenitors (P) induced by Myc/DNp53; or from *Ptch1* mutant MB. The difference between Zfx probe levels in *Ptch1+/-* MB tumor samples versus every other group is significant (*P*<0.02).

(B) Signals for ZFX probes in microarray dataset GSE21140 from human MB of different molecular subtypes: group C, group D, SHH and WNT. Shown are ZFX probe values in all samples and females only, as well as the expression of ZFY in males only. Significant differences and associated P-values are indicated.

**Figure S5. Overlap ZFX targets from DAOY KD array and ChIP-seq are not significantly enriched in expression arrays from murine ESC and HSC**

(A&B) Heatmaps generated by gene set enrichment analysis (GSEA) comparing Overlap ZFX targets from comparison of ZFX KD microarray in DAOY with ChIP-seq targets >1kb from TSS in DAOY and murine ESC (Figure 6B; n=30) with previously published (Galan-Caridad *et al*., 2007) microarray results from murine *Zfx*flox and *Zfx*CKO HSC (A) and *Zfx*flox and *Zfx*KO ESC (B).
